# Supplementary material for: Gene Loss and Acquisition in Lineages of Pseudomonas aeruginosa Evolving in Cystic Fibrosis Patient Airways
Source: PubMed Central journal article supplement (PMC7593970; doi:10.1128/mbio.02359-20), 2020-10-27

**A**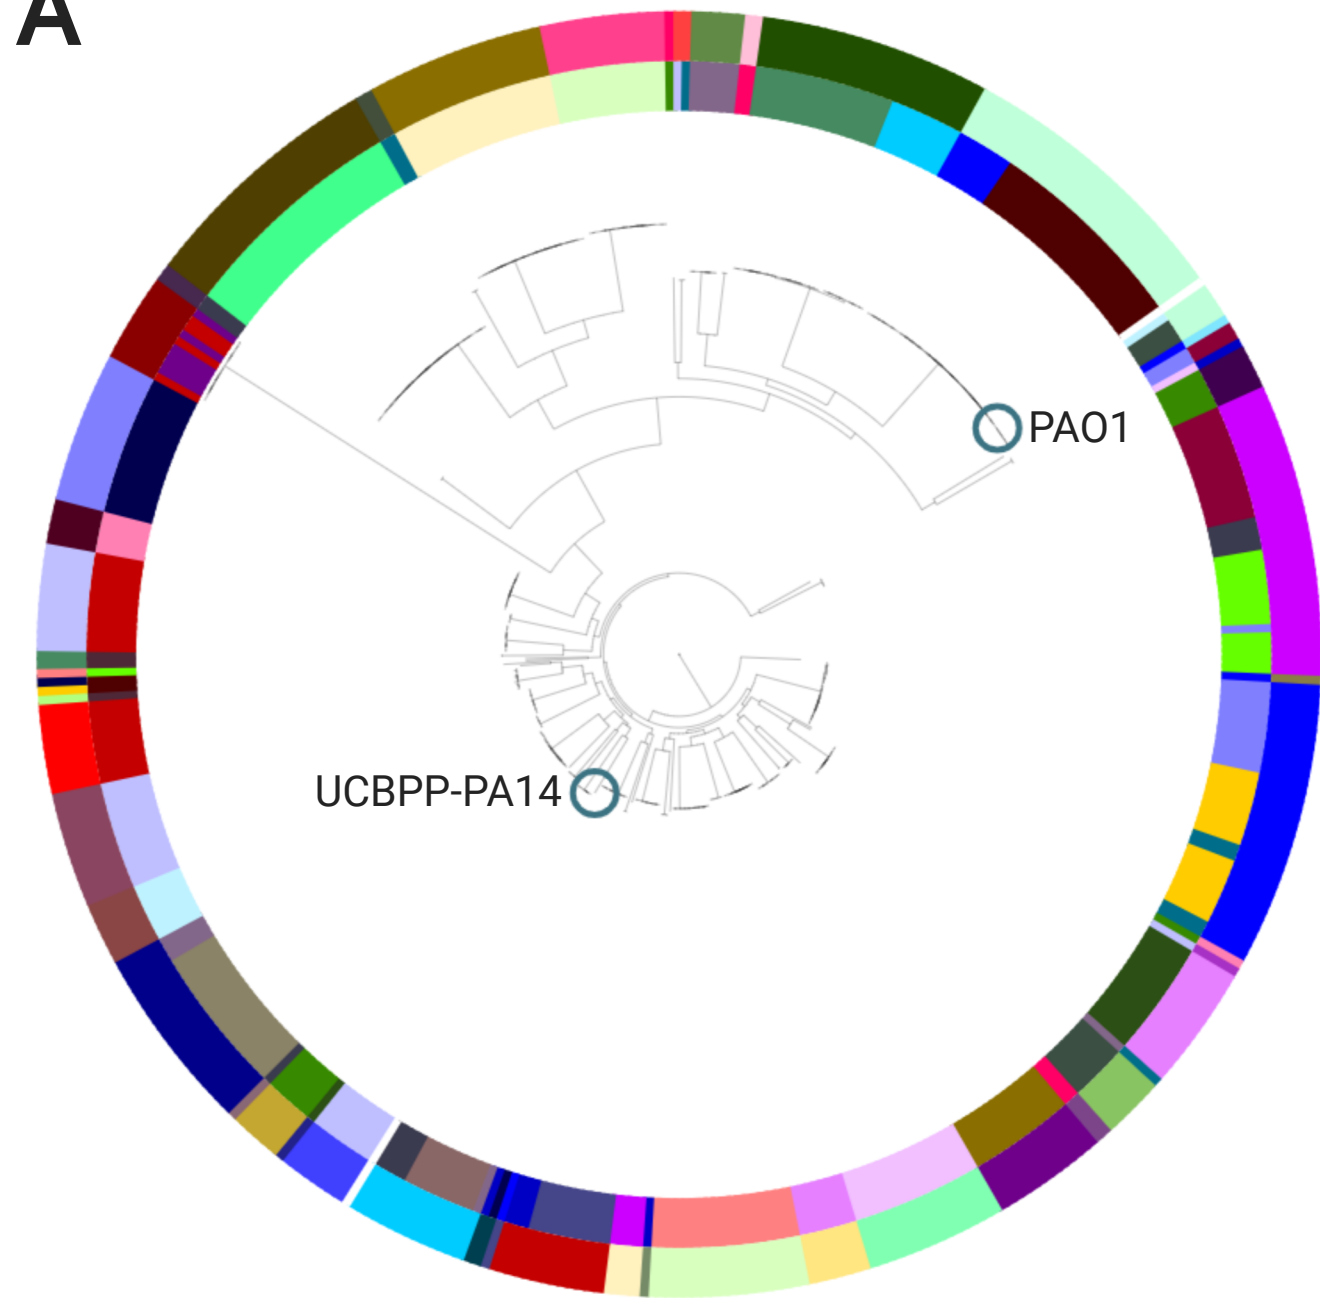**B**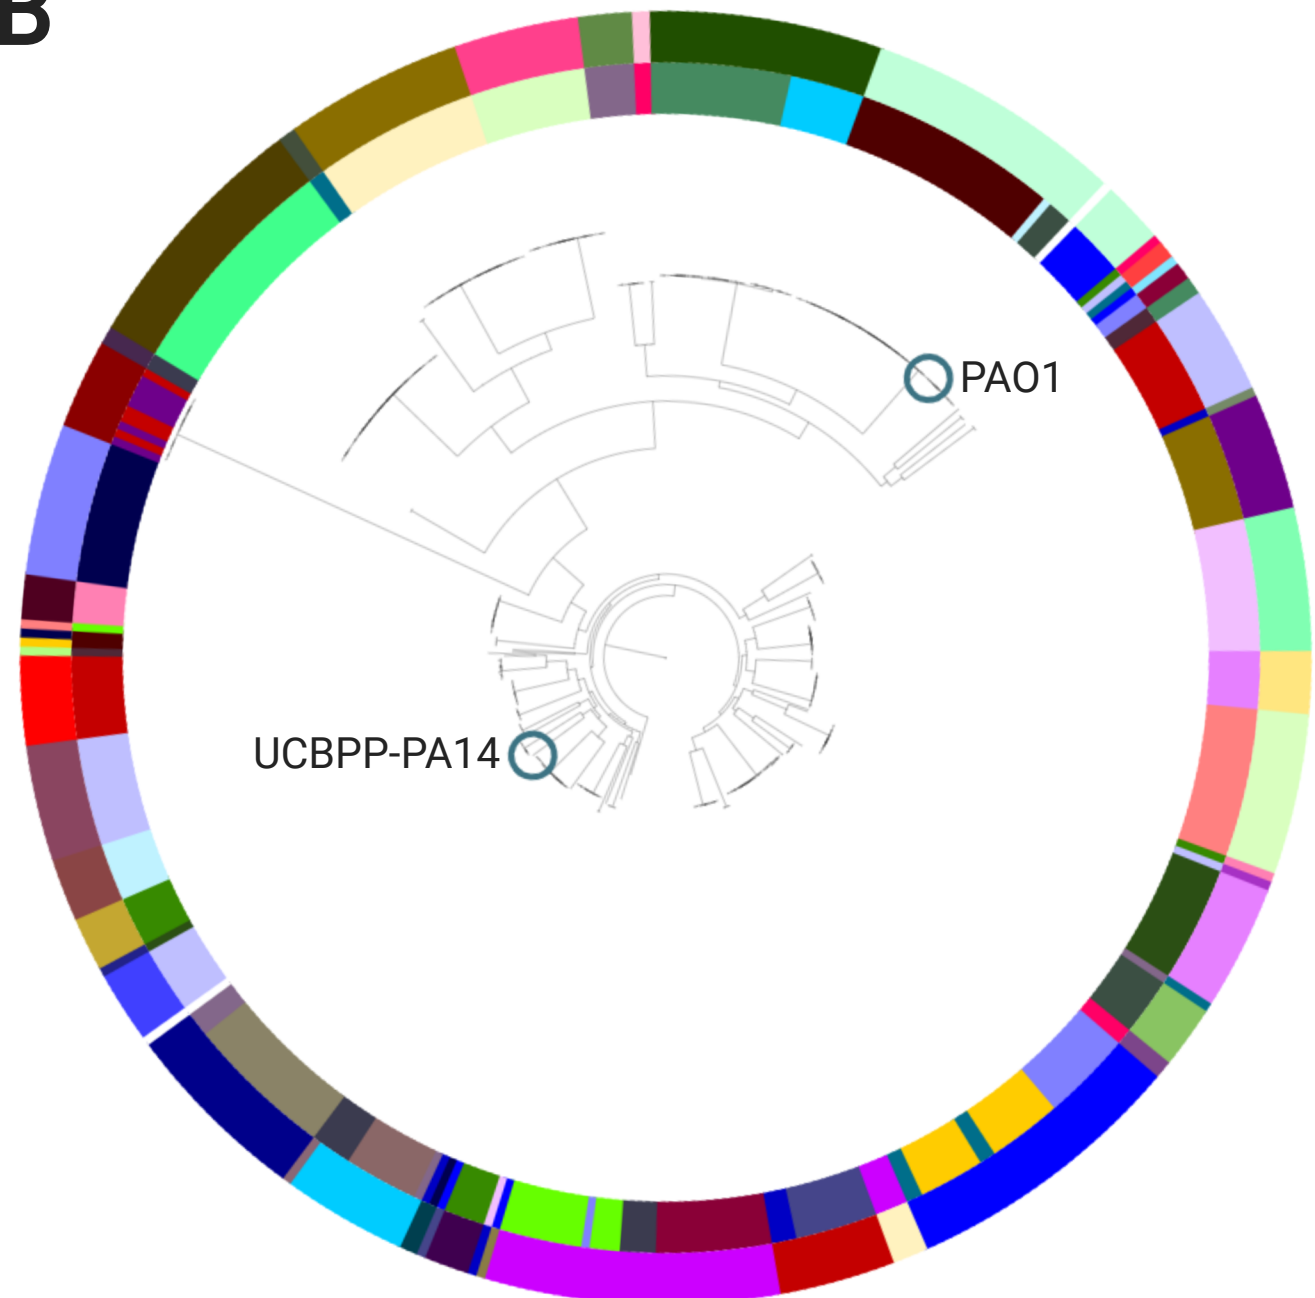

Supplement: mBio.02359-20-sf003.pdf [file mBio.02359-20-sf003.pdf]
